# Supplementary material for: Quantifying differences in the canine gut microbiome between fresh and processed diets: A home-based, cross- sectional study with demographic diversity
Source: Research Square preprint supplement (doi:10.21203/rs.3.rs-6401817/v1), 2025-10-03
Supplement: Supplementary file 1 [file 2680683c8f3996a4163b3326.docx]

| Diet | Breed and number of dogs | Age (median, min-max years) | Sex (M:F) |
| --- | --- | --- | --- |
| Butternut Box  (n =42) | Bocker - (Beagle x Cocker Spaniel mix)  Boston Terrier  Cava-Tzu - (Cavalier King Charles x Shih Tzu mix)  Cavalier King Charles Spaniel x 2  Cavapoo - (Cavalier King Charles Spaniel x Poodle mix) x 3  Cockapoo - (Cocker Spaniel x Poodle mix) x 4  Cocker Spaniel  Dachshund x 2  Doberman Pinscher  English Cocker Spaniel  English Pointer  Golden Retriever x 2  Jack-A-Poo - (Jack Russell Terrier x Poodle mix)  Labrador Retriever x 2  Miniature American Shepherd x 2  Mixed Breed x 7  Pembroke Welsh Corgi x 2  Pug  Standard Poodle  Vizsla x 2  Weimaraner  Whippet x 2  Yorkshire Terrier | 2.5 (<1-8) | 23:19 |
| Kibble  (n = 46) | Beagle  Border Collie x 2  Boxer  Cavachon - (Bichon Frise x Cavalier King Charles Spaniel mix)  Cavapoo - (Cavalier King Charles Spaniel x Poodle mix)  Chihuahua  Chow Chow  Cockapoo - (Cocker Spaniel x Poodle mix) x 3  Cocker Spaniel x 2  Dachshund x 3  English Springer Spaniel x 2  Flat-Coated Retriever x 3  German Shepherd Dog  Greyhound  Jackshund - (Jack Russell Terrier x Dachshund mix)  Jug - (Jack Russell x Pug mix)  Labradoodle Miniature - (Labrador Retriever x Toy or Miniature Poodle mix)  Labrador Retriever x 3  Miniature Schnauzer  Mixed Breed x 10  Sprocker Spaniel - (English Springer Spaniel x Cocker Spaniel mix)  Standard Poodle  NAs x 4 | 3 (1-7) | 20:26 |
| Combination  (n = 11) | Borador - (Border Collie x Labrador Retriever mix)  Border Collie  Cockapoo - (Cocker Spaniel x Poodle mix)  Cocker Spaniel  Kelpie Shepherd - (Australian Kelpie x German Shepherd mix)  Labradoodle Miniature - (Labrador Retriever x Toy or Miniature Poodle mix)  Miniature Schnauzer  Pomeranian  Shih-Poo - (Shih-Tzu x Poodle mix)  Shollie - (German Shepherd x Collie mix)  Standard Schnauzer | 3 (2-8) | 7:4 |
| Raw  (n = 3) | Border Collie  Dachshund  Labrador Retriever | 3 (2-3) | 2:1 |

Supplementary Table 1: Dog breeds assessed in the study grouped by diet type with median age in years (median, min-max) and sex are shown.
